# Supplementary material
Source: PubMed Central journal article supplement (PMC6101197)
Supplement: NIHMS79024-supplement-Supplementary_Figures.pdf [file NIHMS79024-supplement-Supplementary_Figures.pdf]

(a)

MIN6

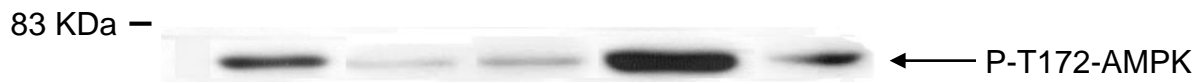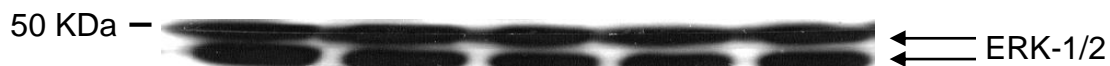

|                    |      |      |    |      |    |
|--------------------|------|------|----|------|----|
| Glucose (mM, 30')  | 3    | 17   | 3  | 3    | 3  |
| Adenovirus         | Null | Null | DN | Null | DN |
| Cytokine mix (48h) | -    | -    | -  | +    | +  |

(b)

Islets

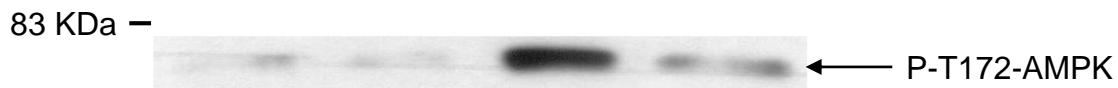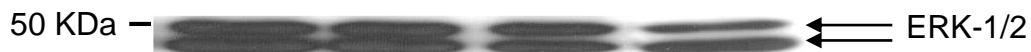

|                    |      |    |      |    |
|--------------------|------|----|------|----|
| Glucose (mM, 30')  | 17   | 17 | 17   | 17 |
| Adenovirus         | Null | DN | Null | DN |
| Cytokine mix (48h) | -    | -  | +    | +  |

Supplementary figure 1

MIN6

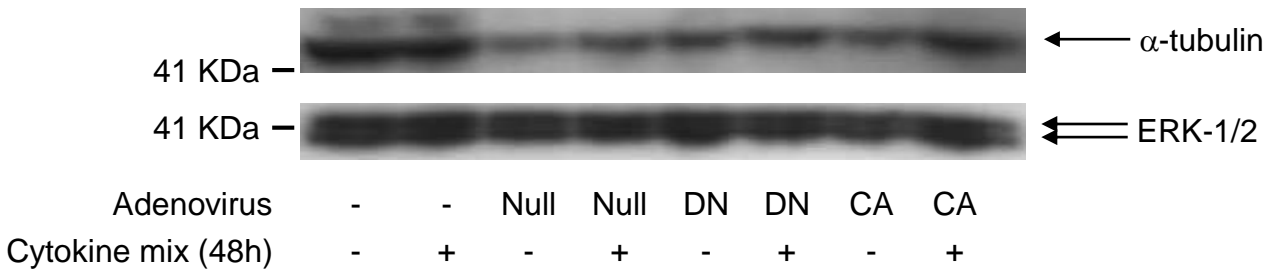

Supplementary  
figure 2
